# Supplementary figures and images for: Host–parasite transcriptomics during immunostimulant-enhanced rejection of salmon lice (Lepeophtheirus salmonis) by Atlantic salmon (Salmo salar)
Source: Atypon-hosted journal article supplement (doi:10.1139/facets-2017-0020), 2017-01-01

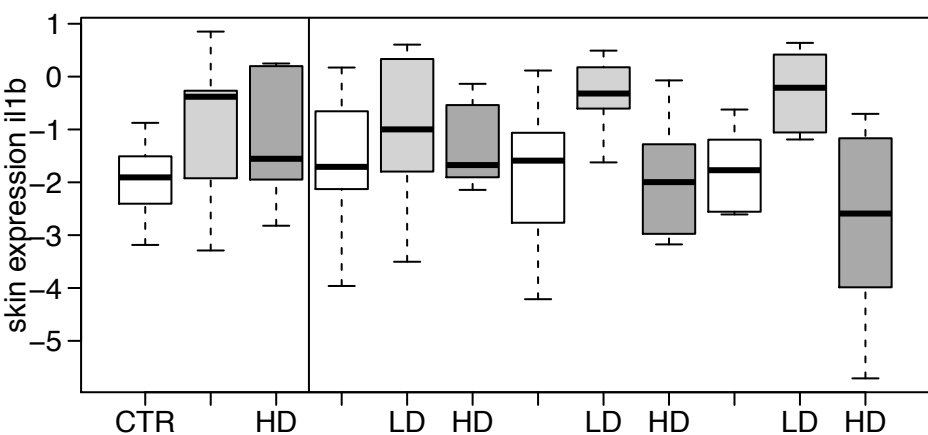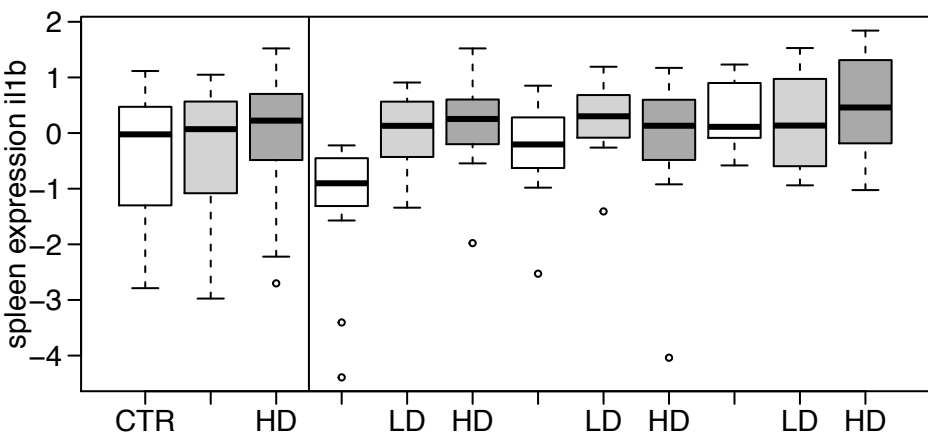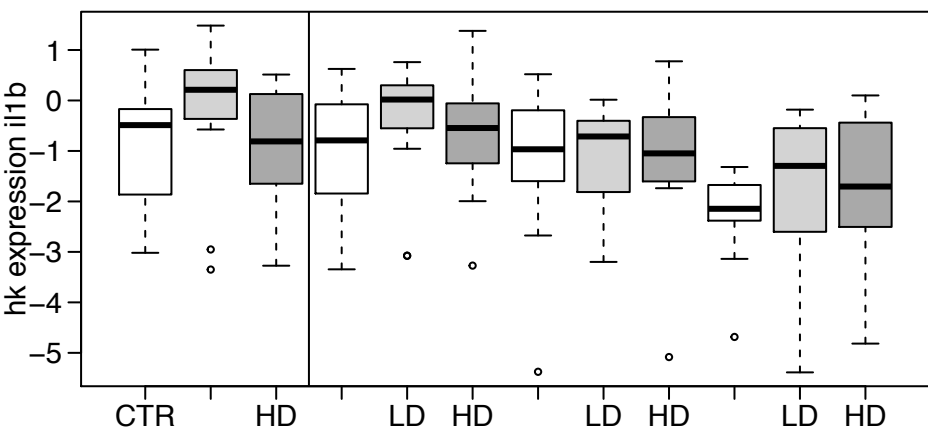

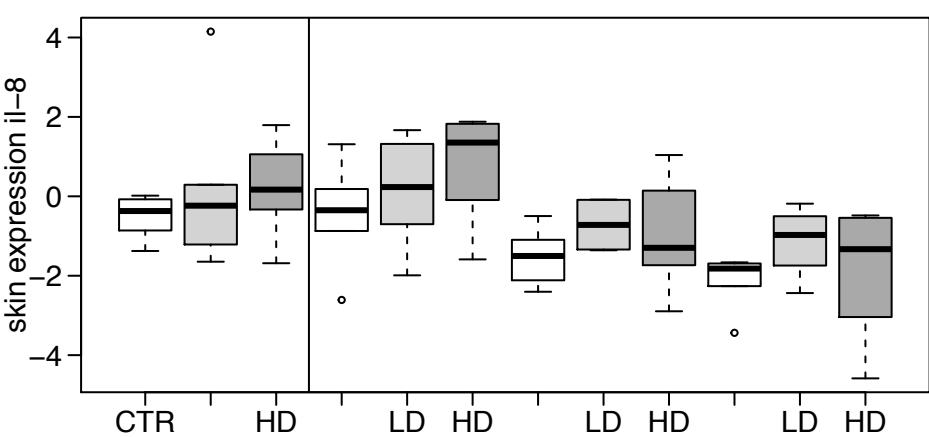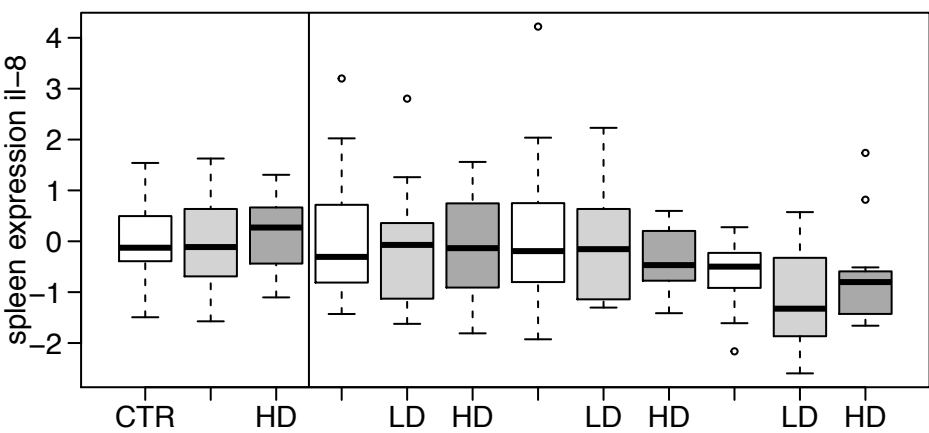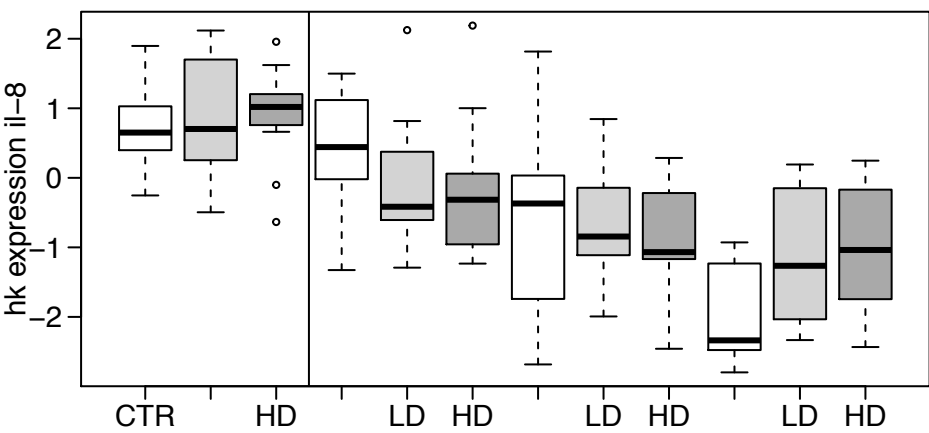

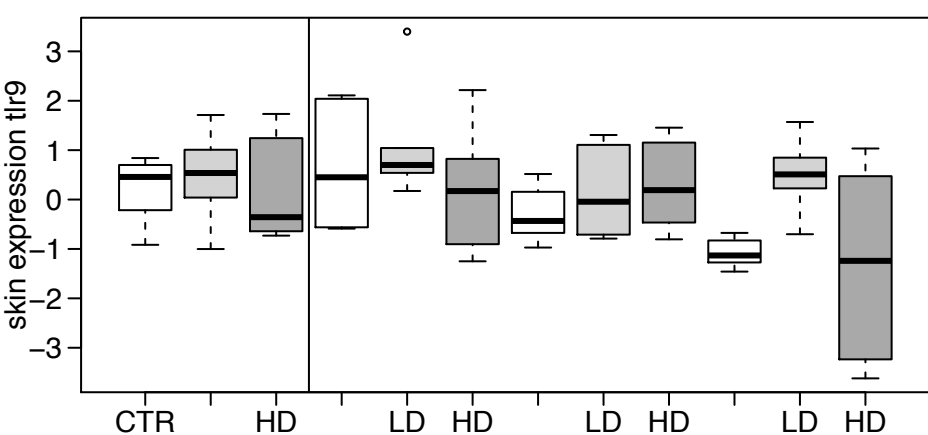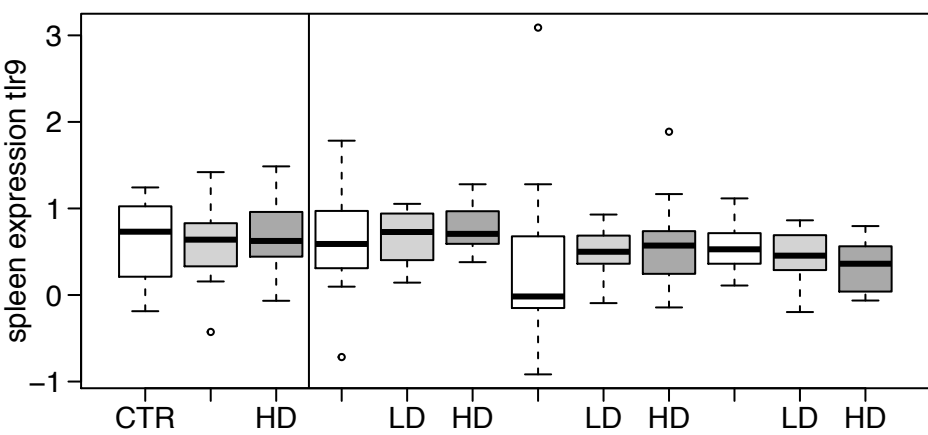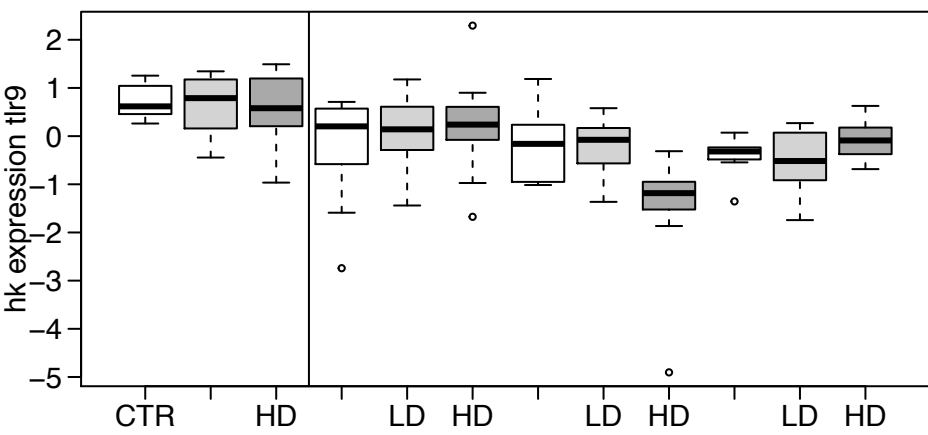

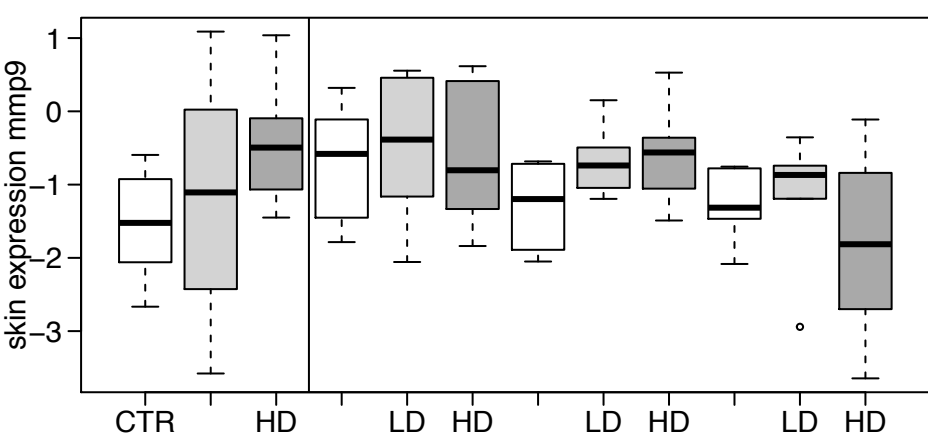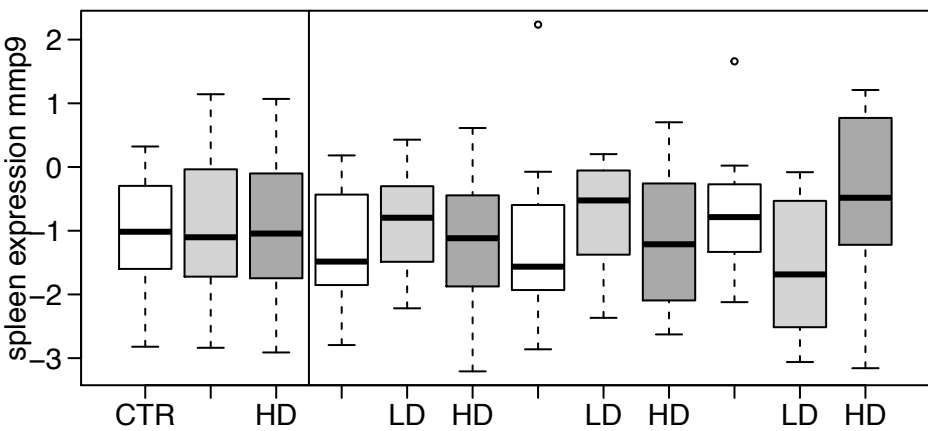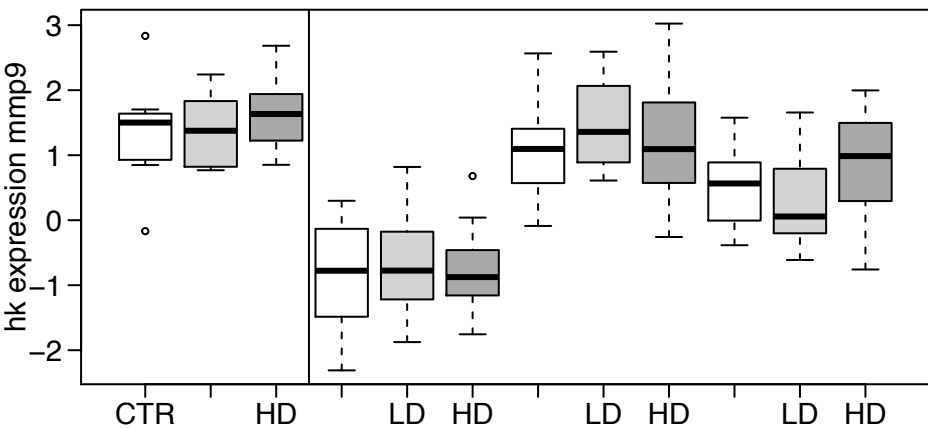

Supplement: facets-2017-0020_supplement2.pdf [file facets-2017-0020_supplement2.pdf]
